# Supplementary material for: Soil microbial biomass and function are altered by 12 years of crop rotation
Source: Copernicus journal article supplement (doi:10.5194/soil-2016-39), 2016-07-04
Supplement: Supplementary file [file soil-2016-39-AC3-supplement.pdf]

1 **Soil-2016-39 Review 3 comments**

2  
3 **Authors' responses are in blue.**

4  
5 **General comments:**

6 The article has investigated the effects of temporal plant diversification by rotating crop on soil  
7 microbial functions and activities, while many other studies focus on the above-ground spatial  
8 biodiversity on soil microbial functions. This study has comprehensively examined a suite of  
9 indexes of soil microbial activities (e.g., MBC, MBN, PMC, and PMN) and functions (e.g., EEA  
10 and CLPP) over one growing season. The introduction is clear, the methods are easy to follow  
11 although they need clarification, and the data interpretation is generally logic. But a couple of  
12 issues need to be addressed as follows:

13  
14 **Response:** Thank you for this thorough review and kind comments. We really appreciate the time and  
15 effort this reviewer put in on their feedback. We have incorporated nearly all their suggestions and we  
16 feel it has greatly improved the manuscript.

17  
18 **Majors:**

- 19  
20 1) The main goal of this study was to investigate whether crop rotation can enhance soil  
21 microbial biomass and functions. Since the study has examine microbial biomass and functions  
22 (e.g., PMC, PMN, and EEA) over one growing season (i.e., in spring, summer, and fall), how  
23 confidently we can attribute enhanced microbial activities and functions to crop rotation rather  
24 than seasonality or their interactions? Can we confidently say that crop rotation is the main  
25 reason for changes in soil microbial functions and activities?

26  
27 **Response:** This is an interesting point. We agree here with this reviewer, that in order to have a  
28 better understanding (and more confidence) of the season versus crop rotation effects we  
29 would need more than one year of data. However, due to the large amount of data collected  
30 (or "comprehensive" as this reviewer put it) we were limited to three sampling points. We  
31 strategically sampled during times when we would expect there would be differences in these  
32 soil microbial responses to look at how season might influence the crop rotation effect on soil  
33 microbial biomass and functioning. We are the first, to our knowledge, to have published the  
34 catabolic response (or community-level physiological profile, CLPP) on more than one date.

- 35  
36 2) Were the crop rotation effects on microbial activities and functions general or unique,  
37 considering that all the measurements were for soils that have experienced an extreme  
38 drought the year before sampling? What the results will be if the sampling took place in a  
39 normal year? Particularly, the authors have discussed that the drying-rewetting effects on  
40 soil microbial community in the discussion (L339-359).

41  
42 **Response:** We show that this sampling period is very distinct in ways other than high microbial  
43 biomass, which is often found at the peak of the growing season (Wardle 2003; Hargreaves &  
44 Hofmockel 2013). Since we only sampled once in the summer, we do not know what a "normal"  
45 year would look like. Due to the good amount of evidence at hand (L. 485-492, L. 500-504), we

46 attributed the large differences in the summer to this drying-wetting event. Although, without  
47 sampling more times during the summer we do not know for sure.

48 Hargreaves, S. K., and Hofmockel, K. S.: Physiological shifts in the microbial  
49 community drive changes in enzyme activity in a perennial agroecosystem,  
50 *Biogeochem.*, 117, 67–79, 2013.

51 Wardle, D. A., Yeates, G. W., Williamson, W., and Bonner, K. I.: The response of a three  
52 trophic level soil food web to the identity and diversity of plant species and  
53 functional groups, *Oikos*, 102, 45–56, 2003.

54  
55

56 **Minors:**

57 1) Problems with the reference order in the main text: L27-28, L41-42, L50-51, L120, L157,  
58 380, 381,385-386, 398-399, 401-402, 423

59  
60 Response: We preferred to cite papers in the manuscript text chronologically. SOIL  
61 leaves the in-text citation order up to the authors. “In terms of in-text citations, the  
62 order can be based on relevance, as well as chronological or alphabetical listing,  
63 depending on the author's preference.” See [http://www.soil-](http://www.soil-journal.net/for_authors/manuscript_preparation.html)  
64 [journal.net/for\\_authors/manuscript\\_preparation.html](http://www.soil-journal.net/for_authors/manuscript_preparation.html)

65  
66

67 2) L54-58, it is better to introduce the rationale of CLPP method and substrates used in this  
68 method, especially for readers who are not familiar with them. More references are  
69 needed about how this method works and how widely it has been used in studies to  
70 examine soil microbial catabolic functions.

71  
72 Response: We now have added more details about the CLPP method and its context in  
73 agroecosystems (L. 68-78)

74  
75

76 3) Soil sampling issue. I am confused whether or not the measured soils were sampled under  
77 the same crop (maize) in all the three seasons. According the statement in L99-101, it is  
78 not the case. Soil sampling took place in April, July, and November, while corn was  
79 planted in June and before June some plots may be planted with other crops. Please  
80 clarify.

81 Response: We now refer to the soils being collected during the same crop phase or year  
82 (L. 9, 84, 340) since they technically were not “under” corn during all seasons.

83  
84

85 4) PMC and PMN measurements. How long did the incubation last? It is 6 months in line  
86 122, but it is 120 days in line 129. How was PMC calculated according to cumulative  
87 respiration? In addition, how many times were the inorganic N extraction conducted to  
88 assess PMN during the entire period of incubation? And how was PMN calculated and  
what is the reference for it? I cannot find it (L117- 131).

89 Response: It was 120 days, or 4 months. We have changed “6” to “4” (L. 139-148). We  
90 further clarified how the cumulative PMC and PMN were calculated (L. 148-151, 192-  
91 193).

- 92  
93 5) L198, 375 please use the multiple symbol instead of “X” letter.

94  
95 Response: We have replaced all letter “X’s” with multiplication signs (×).

- 96  
97 6) Line 2013 should it be “P” rather than “Ps”?

98  
99 Response: This was changed.

- 100  
101 7) L210-211, please clarify the relation between cumulative CO<sub>2</sub> respiration and PMC.  
102 Otherwise, the statement in these lines is not true.

103  
104 Response: We removed reference of cumulative respiration and only refer to it as PMC,  
105 and they are the same thing.

- 106  
107 8) L228-230, the text “increased crop diversity decreasing the qCO<sub>2</sub> by 16, 40, 28% in  
108 CSW, CSW1, and CSW2...” does not match the results in Fig. 2. In CSW, qCO<sub>2</sub> was not  
109 always decreased compared to mC (i.e., the control) according to Fig. 2 in spring,  
110 summer, and fall. Moreover, is the difference statistically significant?

111  
112 Response: These were changed, and the significant post-hoc results are displayed in Fig.  
113 2.

- 114  
115 9) L291 “negative” should be “negatively”

116  
117 Response: This was changed.

- 118  
119  
120 10) In the discussion, I would like to read the discussion of “crop diversity and soil microbial  
121 functions” before “seasonal dynamics and N limitation”, as the former is the focus of this  
122 study, and they directly answer the two questions asked in the introduction.

123  
124 Response: We changed the order of these sections.

- 125  
126  
127 11) L448-453 the statement does not match Figure. S4. We cannot tell which data are from  
128 the less and which are from the more crop rotations from this Figure. Please clarify.

129  
130 Response: We added the letter ‘d’ to ‘Fig. S5’ to signify that this is the panel we were  
131 explaining, and hopefully clarify this statement (L. 442).

132

133 12) The statements in L399-400 and L411-412 are not clear to me. Which tables or figures  
134 can show the results? And what are the indexes of microbial catabolic evenness?

135  
136 Response: Thank you for noticing this. We added 'Table 4' after these statements - from  
137 where we are drawing on these data (L 399,412).

138  
139 13) L471-472 as a main finding of this study, it should be discussed in details but it was not.  
140 Please specify or remove it.

141  
142 Response: We now explain this idea further, and earlier in the Discussion (L. 350-376).

143  
144

#### 145 **Figures and tables**

146 Tables 1 and 2: it is easy to read when all the contents of a table are in one page.

147  
148 Response: We now have all the components of tables on one page.

149  
150 Table 3 caption. I do not understand why adding Fig. 5 at the end? What does it mean? This is no  
151 Fig. 5 in the manuscript.

152  
153 Response: This was supposed to be 'Fig. 4'. It has now been changed.

154  
155 Fig. 1: as mentioned before, cumulative respiration is different from potential mineralizable C,  
156 please clarify the relation between them.

157  
158 Response: We have changed this to PMC.

159  
160 Figs. 1 and 2: since seasonality has strong effects on soil microbial activity and functions, we  
161 need to know how crop rotation effects in each season. It is better to add the multiple comparison  
162 of soil microbial activity in each season in these two figures.

163  
164 Response: We have now shown overall crop rotation post hoc tests in these figures. Because  
165 season and rotation did not interact, we felt it was improper to analyze each date individually.  
166 Although, we can understand this reviewer's perspective. Sometimes when one factor is  
167 dominating ANOVAs it might be better to analyze treatment effects within each date  
168 individually. We wanted to highlight interactions, also the direction of treatment trends is  
169 rather consistent among each season.

170
